# Supplementary material for: Preparation of highly oriented organic–LDH hybrid films by combining the decarbonation, anion-exchange, and delamination processes
Source: Royal Society of Chemistry journal article supplement (doi:10.1039/b601346e), 2006-01-01
Supplement: b601346e.pdf [file b601346e.pdf]

## Electronic Supplementary Information

### Preparation of highly-oriented organic-LDH hybrid films by combining the decarbonation, anion-exchange, and delamination processes

Kentaro Okamoto, Takayoshi Sasaki, Taketoshi Fujita and Nobuo Iyi

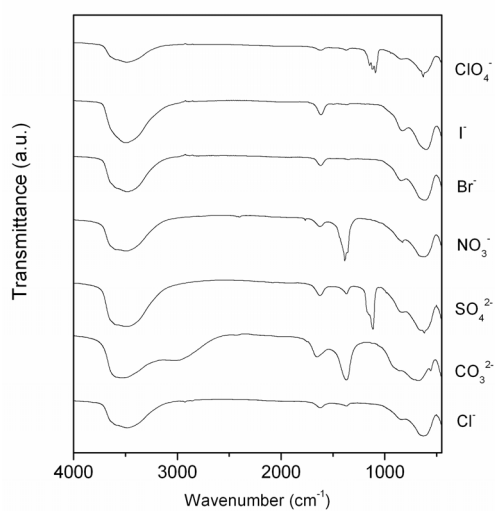

S-1. Infrared spectra of the obtained powdery LDH3s containing various inorganic anion ions.

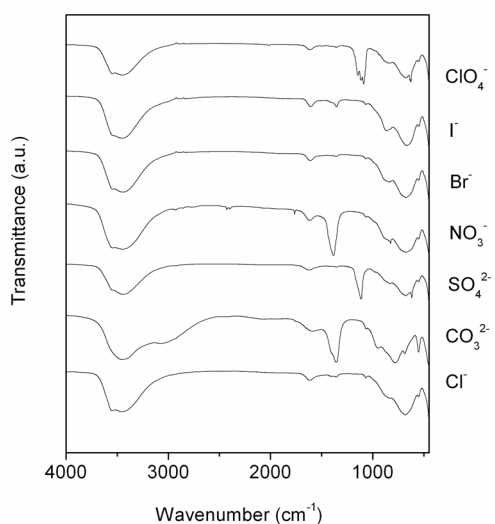

S-2. Infrared spectra of the obtained powdery LDH2s containing various inorganic anion ions.

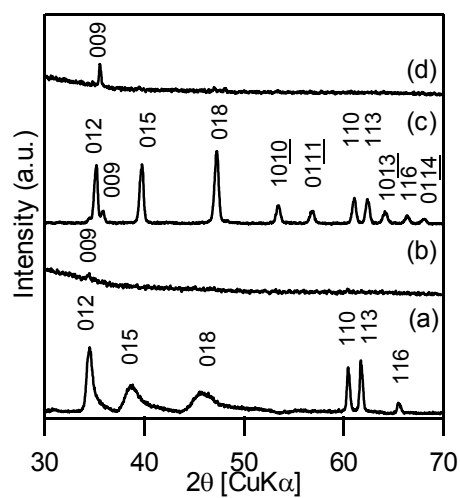

S-3. Magnified XRD patterns of (a) CO<sub>3</sub><sup>2-</sup>LDH3 powder, (b) CO<sub>3</sub><sup>2-</sup>LDH3 film, (c) CO<sub>3</sub><sup>2-</sup>LDH2 powder, and (d) CO<sub>3</sub><sup>2-</sup>LDH2 film on glass substrates.

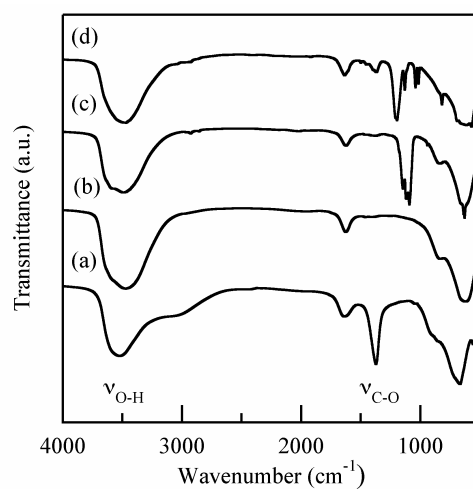

S-4. Infrared spectra of thin LDH3 films formed on glass substrates. (a) CO<sub>3</sub><sup>2-</sup>LDH3 obtained by casting its aqueous suspension and converted to (b) Cl<sup>-</sup>LDH3 by decarbonation, and to (c) ClO<sub>4</sub><sup>-</sup>LDH3, and (d) Tos<sup>-</sup>LDH3.

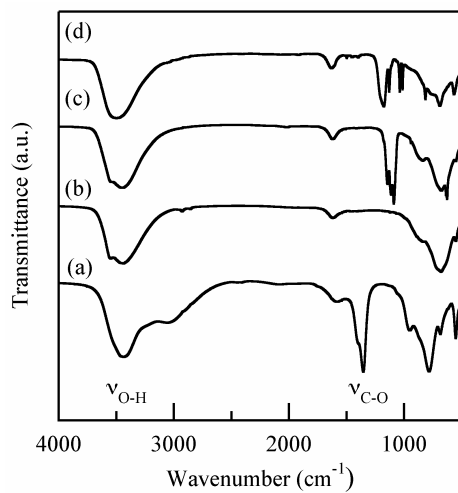

**S-5.** Infrared spectra of thin LDH2 films formed on glass substrates. (a) CO<sub>3</sub><sup>2-</sup>LDH2 obtained by casting its aqueous suspension and converted to (b) Cl<sup>-</sup>LDH2 by decarbonation, and to (c) ClO<sub>4</sub><sup>-</sup>LDH2, and (d) Tos<sup>-</sup>LDH2.

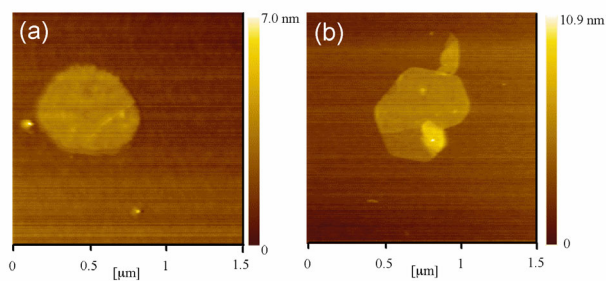

**S-6.** Tapping mode AFM images of delaminated (a) ClO<sub>4</sub><sup>-</sup>LDH3 and (b) ClO<sub>4</sub><sup>-</sup>LDH2 sheets deposited onto a silicon substrate.

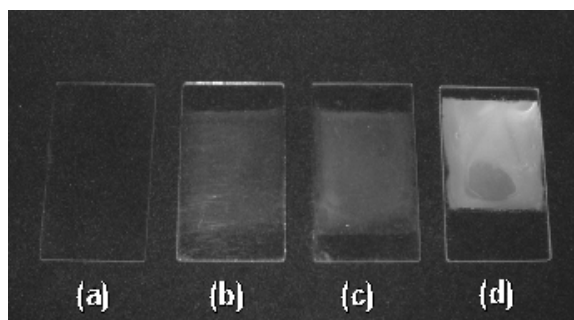

**S-7.** Photos of a glass substrate, and thin films on the glass substrates: (a) Glass substrate only, (b)  $\text{ClO}_4^-$ LDH3 film (from  $\text{ClO}_4^-$ LDH3/FA colloidal suspension), (c)  $\text{Tos}^-$ LDH3 film (from  $\text{Tos}^-$ LDH3/FA colloidal suspension), (d)  $\text{CO}_3^{2-}$ LDH3 film (from formed using  $\text{CO}_3^{2-}$ LDH3/water suspension). Films (ca.  $9.5 \text{ cm}^2$ ) were prepared by applying 100mL of LDH3/solvent (0.02 mol/L) to substrates.
